# Supplementary material
Source: Springer Nature journal article supplement (https://www.springermedizin.de/resource/supplementary/12936_2011_1701_MOESM1_ESM.pdf/9541520)

# 1. Longitudinal study

Routine statistics in 12 HF (diagnoses, laboratory tests and drugs)

## Pre-intervention survey in 9 intervention HF

937 consultations observed

among which **6 matched HF**  
635 consultations observed

## Pre-intervention survey in 3 matched control HF

307 consultations observed

## 2a. Before and after study

RDT implementation

## Post-intervention survey in 9 intervention HF

954 consultations observed

among which **6 matched HF**  
637 consultations observed

## 2b. Cluster randomized study

## Post-intervention survey in 3 matched control HF

330 consultations observed

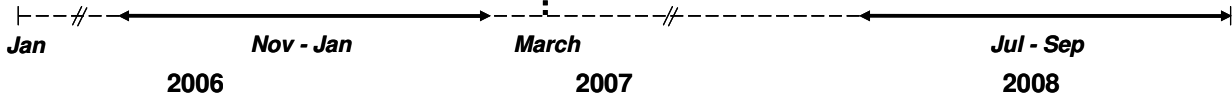

Supplement: MOESM1 [file 9541520]
